# Supplementary material
Source: publisher figshare collection journal article supplement (https://gsapubs.figshare.com/ndownloader/files/25541720)
Supplement: Supplementary file 1 [file 25541720]

## Sheet: Fayalite cumulate whole rock
DR5: Major and trace element whole rock data for fayalite cumulates of Vergenoeg
Sample	KL24 190m			V6 395m			V6 605m			KL24 203m			V6 422m			V6 570m
Alteration	fresh to weakly altered									moderately to strongly altered
wt%
SiO2	29.7407			27.43			28.2495			19.71			22.06			24.76
TiO2	0.0496894			0.05679			0.0865211			0.1247			0.1404			1.618
Fe2O3	70.973			67.97			70.1804			76.85			67.81			63.32
MnO	1.25345			1.041			1.42446			0.8054			1.015			1.268
MgO	0.764372			0.68			0.676777			0.585			0.884			0.563
CaO	0.141091			1.112			2.5705			0.2766			1.169			6.055
Na2O	0.581882			0.555			0.650707			0.626			0.499			0.374
K2O	0.00669478			0.01585			0.0169559			0.01052			0.0132			0.01401
P2O5	0.112935			0.5225			0.203555			0.2562			0.405			0.6294
LOI	-4.28			0			-4.28			0			5.64			1.12
total	99.8462			99.3831			104.059			99.8332			99.6356			99.7214
ppm		1σ			1σ			1σ			1σ			1σ			1σ
Al*	67.98	3.1325		94.86	4.7525		440.98	20.56		903.89	42.7075		317.32	14.865		799.122	36.9975
Sc	46.0825	2.665		21.66	1.3775		14.7675	0.96		31.8425	2.0075		17.225	1.11		8.985	0.595
V	4.5	0.25		5.4225	0.31		4.9575	0.2975		10	0.5425		7.525	0.4225		12.17	0.65
Cr	21.1675	1.4775		22.475	1.585		20.795	1.6375		18.845	1.5025		15.6475	1.4175		23.44	1.61
Co	20.9425	0.725		14.2225	0.55		23.2225	0.8725		16.5625	0.635		28.005	1.04		9.8725	0.395
Ni	18.165	0.955		13.85	0.8225		12.7225	0.815		18.6925	1.065		11.085	0.735		10.5625	0.6725
Ga	0.559	0.0675		24.3125	1.2		4.185	0.265		23.995	1.1875		21.845	1.095		9.3225	0.4925
Rb	0.5915	0.0585		0.97525	0.083		0.65925	0.07225		2.345	0.16		0.6165	0.06625		0.4415	0.05
Sr	1.12425	0.071		2.6175	0.1425		3.875	0.2125		4.78	0.2475		27.2075	1.2225		4.7625	0.24
Y	258.42	11.8175		1860.1	91.9925		350.607	17.375		318.02	15.765		949.375	47		317.358	15.7225
Zr	32.925	1.3525		6.3425	0.3325		4.44	0.2625		26.2875	1.1825		5.6375	0.31		7.745	0.3925
Nb	95.575	3.39		34.4775	1.35		112.215	4.3025		162.073	6.1925		56.6175	2.2		632.243	23.995
La	1.18325	0.06625		456.343	17.8175		131.377	5.16		161.707	6.34		272.078	10.6475		311.765	12.18
Ce	2.4225	0.11575		1365.08	58.1975		265.67	11.3525		311.168	13.295		738.78	31.5325		451.215	19.2525
Pr	0.2715	0.02325		203.002	8.645		33.65	1.4525		33.875	1.46		106.695	4.56		41.5775	1.7875
Nd	1.1775	0.114		883.71	36.875		135.98	5.8		115.648	4.935		450.562	18.8925		124.435	5.2925
Sm	0.42425	0.075		219.045	9.0375		30.095	1.3875		20.825	0.985		110.27	4.645		19.925	0.94
Eu	0.014	0.011625		4.9825	0.2675		0.82075	0.067		0.564	0.04925		2.48	0.15		0.551	0.048
Gd	1.325	0.1375		227.085	10.045		29.855	1.46		18.6775	0.9475		112.838	5.085		17.185	0.8725
Tb	0.77725	0.04875		40.465	1.93		5.4475	0.2775		3.5175	0.1825		19.9525	0.965		2.95	0.155
Dy	14.065	0.6625		295.93	13.4875		43.495	2.0675		30.9175	1.485		147.658	6.7875		24.3125	1.175
Ho	7.2125	0.3		63.2025	2.685		10.31	0.46		9.2625	0.4125		31.3725	1.3475		6.3425	0.2875
Er	54.705	2.3925		194.405	9.0525		41.11	1.9725		53.3325	2.53		101.245	4.7575		29.3775	1.4175
Tm	19.7125	0.8525		30.7475	1.4325		9.9925	0.48		17.205	0.81		17.8125	0.8425		8.075	0.39
Yb	257.165	10.2		208.567	8.985		100.067	4.3775		212.99	9.185		138.105	6		92.515	4.0325
Lu	58.0275	2.44		28.0075	1.2875		18.115	0.8425		45.6325	2.085		21.9575	1.02		17.3525	0.8025
Hf	1.02725	0.0915		0.32475	0.04825		0.12125	0.03775		0.766	0.0805		0.3025	0.04925		0.31225	0.04675
Ta	2.365	0.12125		0.548	0.0425		1.303	0.08275		3.385	0.1775		0.86775	0.0605		7.835	0.3825
Pb	1.575	0.107		4.0625	0.2525		2.3125	0.165		7.0575	0.4275		2.0825	0.145		1.6325	0.115
Th	0.041	0.00975		60.8725	3.38		9.04	0.52		3.875	0.23		37.0925	2.07		1.9925	0.125
U	0.27525	0.02525		65.5	4.4125		13.045	0.8875		6.58	0.4525		31.8625	2.1525		2.72	0.1925
total REE	360.455			4192.57			837.871			989.689			2249.85			1130.23
* Al2O3 is usually below the detection limit of the XRF analysis and has been analysed by LA-ICP-MS

## Sheet: G48417
Brandt, S., et al., 2021, Cumulate olivine: A novel host for heavy rare earth element mineralization: Geology, v. 49, https://doi.org/10.1130/G48417.1
